# Supplementary material
Source: publisher figshare collection journal article supplement (https://frontiersin.figshare.com/ndownloader/files/25850198)
Supplement: Supplementary file [file 25850198]

**Supplemental Table 2: Sleep-related cognitions - Study sample and design characteristics**

| study no. | Authors                 | Publication year | Sample size                                                                                                                               | Child age at sleep assessment                                                                 | Sample type and background information                                   | Study design                                             |
|-----------|-------------------------|------------------|-------------------------------------------------------------------------------------------------------------------------------------------|-----------------------------------------------------------------------------------------------|--------------------------------------------------------------------------|----------------------------------------------------------|
| 1         | Morrell                 | 1999             | <i>N</i> (Total) = 149<br><i>N</i> (SPG) = 26<br><i>N</i> (CG) = 123<br><i>N</i> (SG) = 59                                                | 12-16 months<br>(mean= 13.72)                                                                 | Community sample<br>(predominantly white; English; middle-upper SES)     | Cross-sectional<br>Control group design                  |
| 2         | Morrell & Cortina-Borja | 2002             | <i>N</i> (Total) = 99<br><i>N</i> (SPG) = 40<br><i>N</i> (CG) = 59                                                                        | 12-19 months<br>(mean= 13.77)                                                                 | Community sample<br>(predominantly white; English; middle-upper SES)     | Cross-sectional<br>Control group design                  |
| 3         | Morrell & Steele        | 2003             | <i>N</i> (Total) = 100<br><i>N</i> (SPG;T1) = 40<br><i>N</i> (CG;T1) = 60<br><i>N</i> (SPG T1 & T2) = 25<br><i>N</i> (SPG T1/not T2) = 15 | T1: 14-16 months<br>(mean SPG= 15; mean CG= 15.3; significant difference)<br>T2: 26-28 months | Community sample<br>(predominantly white; English; middle-upper SES)     | Cross-sectional and longitudinal<br>Control group design |
| 4         | Sadeh et al.            | 2007             | <i>N</i> (Total) = 96<br><i>N</i> (SPG) = 48<br><i>N</i> (CG) = 48                                                                        | 4 - 29 months<br>(mean SPG= 13.08; CG= 15.05; no significant difference)                      | Clinical sample and community sample control group (Israeli; middle SES) | Cross-sectional<br>Case-control study                    |
| 5         | Johnson & McMahon       | 2008             | <i>N</i> (Total) = 110                                                                                                                    | 2 - 5 years<br>(mean= 3.81)                                                                   | Community sample<br>(predominantly Caucasian; Australian)                | Cross-sectional<br>Correlational design                  |
| 6         | Tikotzky & Sadeh        | 2009             | <i>N</i> (Total) = 85                                                                                                                     | 12 months                                                                                     | Community sample<br>(Israeli; middle-upper SES)                          | Longitudinal<br>Prospective cohort study                 |

|     |                                   |      |                                                                                             |                                                                                     |                                                                                                                                         |                                          |
|-----|-----------------------------------|------|---------------------------------------------------------------------------------------------|-------------------------------------------------------------------------------------|-----------------------------------------------------------------------------------------------------------------------------------------|------------------------------------------|
| 7   | Tikotzky et al.                   | 2010 | <i>N</i> (Total) = 141                                                                      | 4.5-30 months (mean= 15.4)                                                          | Community sample (Israeli; middle-upper SES; 42 families with parents raised under communal sleeping arrangements in Israeli kibbutzim) | Cross-sectional correlational design     |
| 8   | Coulombe & Reid                   | 2012 | <i>N</i> (Total) = 203                                                                      | 2 - 5 years<br>(mean= 3.4)                                                          | Community sample<br>(90% Caucasian; Canadian; diverse SES)                                                                              | Cross-sectional<br>Correlational design  |
| 9   | Teti & Crosby                     | 2012 | <i>N</i> (Total) = 45                                                                       | 1 - 24 months<br>(mean= 9.27)                                                       | Community sample<br>(91% white; US-American; diverse SES)                                                                               | Cross-sectional<br>Correlational design  |
| 10  | Tikotzky & Shaashua               | 2012 | <i>N</i> (Total) = 71                                                                       | 3.75 - 4.5 years<br>(mean= 4.15)                                                    | Community sample<br>(Israeli; middle-upper SES)                                                                                         | Longitudinal<br>Prospective cohort study |
| 11  | Axelsson, Hill, Sadeh & Dimitriou | 2013 | <i>N</i> (Total) = 28<br><i>N</i> (WS) = 14<br><i>N</i> (TD) = 14                           | 18.03 – 47.47 months<br>(mean WS= 31.67; mean TD= 31.55; no significant difference) | Community sample<br>(WS-group: children with Williams Syndrome<br>TD-group: typically developing matched controls)                      | Cross-sectional<br>Correlational design  |
| 12  | Golik et al.                      | 2013 | <i>N</i> (Total) = 201<br><i>N</i> (SPG) = 31<br><i>N</i> (CG) = 170                        | 6- 36 months<br>(mean SPG= 13.4; CG= 16.5; no significant difference)               | Clinical sample and community sample control group (Israeli)                                                                            | Cross-sectional<br>Case-control study    |
| 13  | Lemery-Chalfant et al.            | 2013 | <i>N</i> (Total) = 582<br><i>N</i> (Twin-pairs) = 291                                       | 12 months                                                                           | Community sample<br>(66% Caucasian; 25% Hispanics; 9% other; US-American; diverse SES)                                                  | Cross-sectional                          |
| 14a | Sadeh et al.                      | 2016 | <i>N</i> (Total) = 144<br><i>N</i> (SPG) = 93<br><i>N</i> (CG1) = 31<br><i>N</i> (CG2) = 20 | 0- 24 months<br>(mean SPG= 12.09; mean CG1= 12.40; no significant difference)       | Clinical sample and community sample control group (Israeli)                                                                            | Cross-sectional<br>Case-control study    |

---

*Note.* Papers are listed by publication year and then alphabetically. SPG= sleep problem group; CG= control group; SG= subgroup; SES= socioeconomic status; T1= time one; T2= time two; WS= Williams Syndrome; TD= typically developing.
